# Supplementary material for: Scoping review of remote rehabilitation (telerehabilitation) services to support people with vision impairment
Source: PubMed Central journal article supplement — BMJ Open. 2022 Aug 1;12(8):e059985. doi: 10.1136/bmjopen-2021-059985 (PMC9345072; doi:10.1136/bmjopen-2021-059985), 2022-08-01
Supplement: bmjopen-2021-059985supp001.pdf [file bmjopen-2021-059985supp001.pdf]

Supplementary material 1 – Quality appraisal

Quantitative studies (N=9)

| Authors                    | Is the question / objective sufficiently described? | Is the study design evident and appropriate? | Is the method of subject/comparison group selection or source of information/input variables described and appropriate? | Are the Subject (and comparison group, if applicable) characteristics sufficiently described? | If interventional and random allocation was possible, was it described? | If interventional and blinding of investigators was possible, was it reported? | If interventional and blinding of subjects was possible, was it reported? | Are outcome and (if applicable) exposure measure(s) well defined and robust to measurement / misclassification bias? Are means of assessment reported? | Is the sample size appropriate? | Are the analytic methods described/justified and appropriate? | Is some estimate of variance is reported for the main results? | Controlled for confounding? | Are results reported in sufficient detail? | Are conclusions supported by the results? | Overall score |
|----------------------------|-----------------------------------------------------|----------------------------------------------|-------------------------------------------------------------------------------------------------------------------------|-----------------------------------------------------------------------------------------------|-------------------------------------------------------------------------|--------------------------------------------------------------------------------|---------------------------------------------------------------------------|--------------------------------------------------------------------------------------------------------------------------------------------------------|---------------------------------|---------------------------------------------------------------|----------------------------------------------------------------|-----------------------------|--------------------------------------------|-------------------------------------------|---------------|
| Bittner et al., 2018       | Yes (2)                                             | Yes (2)                                      | Yes (2)                                                                                                                 | Yes (2)                                                                                       | N/A                                                                     | N/A                                                                            | N/A                                                                       | Yes (2)                                                                                                                                                | N/A                             | Yes (2)                                                       | Yes (2)                                                        | N/A                         | Yes (2)                                    | Yes (2)                                   | 1.00          |
| Dogru-Huzmeli et al., 2021 | Yes (2)                                             | Yes (2)                                      | N/A                                                                                                                     | Partial (1)                                                                                   | N/A                                                                     | N/A                                                                            | N/A                                                                       | Partial (1)                                                                                                                                            | N/A                             | N/A                                                           | N/A                                                            | N/A                         | Partial (1)                                | Partial (1)                               | 0.67          |
| Ihrig, 2019                | Yes (2)                                             | Yes (2)                                      | N/A                                                                                                                     | Partial (1)                                                                                   | N/A                                                                     | N/A                                                                            | N/A                                                                       | Yes (2)                                                                                                                                                | N/A                             | Yes (2)                                                       | Yes (2)                                                        | N/A                         | Yes (2)                                    | Yes (2)                                   | 0.94          |
| Lancioni et al., 2011      | Yes (2)                                             | Yes (2)                                      | N/A                                                                                                                     | Yes (2)                                                                                       | N/A                                                                     | N/A                                                                            | N/A                                                                       | Partial (1)                                                                                                                                            | N/A                             | N/A                                                           | No (0)                                                         | N/A                         | Yes (2)                                    | Yes (2)                                   | 0.64          |
| Lorenzini & Wittich, 2021  | Yes (2)                                             | Yes (2)                                      | Yes (2)                                                                                                                 | Yes (2)                                                                                       | Yes (2)                                                                 | Yes (2)                                                                        | N/A                                                                       | Yes (2)                                                                                                                                                | Yes (2)                         | Yes (2)                                                       | Yes (2)                                                        | Yes (2)                     | Yes (2)                                    | Yes (2)                                   | 1.00          |

|                              |         |         |             |         |         |         |         |         |             |         |         |         |         |             |      |
|------------------------------|---------|---------|-------------|---------|---------|---------|---------|---------|-------------|---------|---------|---------|---------|-------------|------|
| Lorenzini & Wittich, 2021    | Yes (2) | Yes (2) | Yes (2)     | Yes (2) | Yes (2) | Yes (2) | N/A     | Yes (2) | Yes (2)     | Yes (2) | N/A     | Yes (2) | Yes (2) | Yes (2)     | 1.00 |
| Sabel & Gudlin, 2014         | Yes (2) | Yes (2) | Yes (2)     | Yes (2) | Yes (2) | Yes (2) | Yes (2) | Yes (2) | Partial (1) | Yes (2) | Yes (2) | Yes (2) | Yes (2) | Partial (1) | 0.93 |
| Senjam <i>et al.</i> , 2021  | Yes (2) | Yes (2) | Yes (2)     | Yes (2) | N/A     | N/A     | N/A     | Yes (2) | N/A         | N/A     | N/A     | N/A     | Yes (2) | Partial (1) | 0.93 |
| Tinelli <i>et al.</i> , 2017 | Yes (2) | Yes (2) | Partial (1) | Yes (2) | N/A     | N/A     | N/A     | Yes (2) | N/A         | Yes (2) | Yes (2) | N/A     | Yes (2) | Yes (2)     | 0.94 |

### Qualitative study (N=1)

| Authors                    | Question / objective sufficiently described? | Study design evident and appropriate? | Context for the study clear? | Connection to a theoretical framework / wider body of knowledge? | Sampling strategy described, relevant and justified? | Data collection methods clearly described and systematic? | Data analysis clearly described and systematic? | Use of verification procedure(s) to establish credibility? | Conclusions supported by the results? | Reflexivity of the account? | Overall score |
|----------------------------|----------------------------------------------|---------------------------------------|------------------------------|------------------------------------------------------------------|------------------------------------------------------|-----------------------------------------------------------|-------------------------------------------------|------------------------------------------------------------|---------------------------------------|-----------------------------|---------------|
| Dunne <i>et al.</i> , 2020 | Yes (2)                                      | Yes (2)                               | Yes (2)                      | Yes (2)                                                          | Partial (1)                                          | Yes (2)                                                   | Partial (1)                                     | Yes (2)                                                    | Yes (2)                               | Partial (1)                 | 0.85          |
