# Supplementary material for: Scoping review of remote rehabilitation (telerehabilitation) services to support people with vision impairment
Source: PubMed Central journal article supplement — BMJ Open. 2022 Aug 1;12(8):e059985. doi: 10.1136/bmjopen-2021-059985 (PMC9345072; doi:10.1136/bmjopen-2021-059985), 2022-08-01
Supplement: bmjopen-2021-059985supp003.pdf [file bmjopen-2021-059985supp003.pdf]

**Supplementary Material 3 – Charities delivering remote rehabilitation**

| <b>Organisation</b>                                            | <b>Remote services</b>                                                                                                                                                                                                          |
|----------------------------------------------------------------|---------------------------------------------------------------------------------------------------------------------------------------------------------------------------------------------------------------------------------|
| Beacon Centre for the Blind                                    | Telephone-based welfare calls and befriending service. Life skills sessions to promote independent living.                                                                                                                      |
| Blind Veterans UK                                              | Practical skills training including maintaining personal (e.g., managing medications) and domestic (e.g., preparing meals) activities of daily living. Remote befriending service and communication technology skills training. |
| Essex Sight                                                    | Telephone-based welfare calls, demonstration of equipment (e.g., kitchen aids and lighting).                                                                                                                                    |
| Henshaws                                                       | Telephone-based welfare calls, befriending groups, physical exercise training (e.g., improving movement, strength and fitness), digital enablement services.                                                                    |
| Galloway's                                                     | Digital skills training                                                                                                                                                                                                         |
| My Sight Nottinghamshire                                       | Telephone-based befriending, digital skills training, physical exercise training (e.g., chair-based and standing exercises).                                                                                                    |
| Peterborough Association for the Blind                         | N/A                                                                                                                                                                                                                             |
| Sight for Surrey                                               | Digital skills training, assistive technology training (e.g., screen magnification software), communication skills training, everyday living skills advice.                                                                     |
| The Cambridgeshire Society for the Blind and Partially Sighted | Telephone-based welfare calls, peer support groups, digital skills training.                                                                                                                                                    |
| Vista                                                          | Digital skills training, assistive technology training (activating and optimising accessibility features), life skills (e.g., meal preparation), online well-being activities (e.g., singing and gardening)                     |
| The Royal National Institute for Blind People                  | Telephone-based counselling and befriending groups, signposting to online resources, online activities                                                                                                                          |

**Supplementary material** – Charities delivery remote rehabilitation. **Key** - N/A: not available
